# Supplementary material for: Dynamic and static behavior of the E–E′ bonds (E, E′ = S and Se) in cystine and derivatives, elucidated by AIM dual functional analysis
Source: Royal Society of Chemistry journal article supplement (doi:10.1039/c4ra13276a), 2015-01-01
Supplement: c4ra13276a1.pdf [file c4ra13276a1.pdf]

## Dynamic and Static Behavior of the E–E' Bonds (E, E' = S and Se) in Cystine and Derivatives, Elucidated by AIM Dual Functional Analysis

Yutaka Tsubomoto, Satoko Hayashi and Waro Nakanishi\*

*Department of Material Science and Chemistry, Faculty of Systems Engineering,*

*Wakayama University, 930 Sakaedani, Wakayama, 640-8510 Japan,*

*Fax: +81 73 457 8253*

*E-mail: nakanisi@sys.wakayama-u.ac.jp*

Optimized structures given by Cartesian coordinates for **1–6**, together with the total energies and the first frequency of the internal vibrations with the 6-311+G(3d) basis sets for S and Se and the 6-311++G(d,p) basis sets for O, N, C and H at the M062X level of the Gaussian 09 program.

**1a** (C<sub>1</sub>): M062X/6-311+G(3d) for S and 6-311++G(d, p) for C, N, O and H.

$E = -1442.629316$  au,  $\nu = 511.2703$  cm<sup>-1</sup>

|    |    |   |           |           |           |
|----|----|---|-----------|-----------|-----------|
| 1  | 16 | 0 | 1.363932  | 1.695491  | 0.706082  |
| 2  | 16 | 0 | 0.097604  | 2.387514  | -0.767498 |
| 3  | 6  | 0 | -0.953468 | 0.954782  | -1.118905 |
| 4  | 6  | 0 | 2.394665  | 0.447434  | -0.147433 |
| 5  | 6  | 0 | -2.075942 | 0.631709  | -0.110828 |
| 6  | 6  | 0 | 2.278612  | -0.971452 | 0.466732  |
| 7  | 6  | 0 | -2.443201 | -0.857213 | -0.218124 |
| 8  | 8  | 0 | -2.148369 | -1.545520 | -1.164909 |
| 9  | 8  | 0 | -3.145189 | -1.313911 | 0.802338  |
| 10 | 7  | 0 | -1.897744 | 0.945309  | 1.299747  |
| 11 | 1  | 0 | -2.977466 | 1.166179  | -0.432784 |
| 12 | 1  | 0 | -3.105648 | -0.622289 | 1.492118  |
| 13 | 1  | 0 | -1.005945 | 0.588568  | 1.635816  |
| 14 | 1  | 0 | -1.914377 | 1.946549  | 1.451631  |
| 15 | 1  | 0 | -1.396444 | 1.179791  | -2.092768 |
| 16 | 1  | 0 | -0.304482 | 0.099277  | -1.289112 |
| 17 | 1  | 0 | 2.439454  | -0.903340 | 1.544398  |
| 18 | 1  | 0 | 3.435726  | 0.768887  | -0.071296 |
| 19 | 1  | 0 | 2.119000  | 0.435963  | -1.204445 |
| 20 | 7  | 0 | 3.219455  | -1.925250 | -0.093788 |
| 21 | 6  | 0 | 0.858207  | -1.472668 | 0.288115  |
| 22 | 8  | 0 | -0.021751 | -1.295238 | 1.091668  |
| 23 | 8  | 0 | 0.665257  | -2.047943 | -0.899341 |
| 24 | 1  | 0 | 3.036934  | -2.081074 | -1.079496 |
| 25 | 1  | 0 | 4.173446  | -1.600902 | 0.013074  |
| 26 | 1  | 0 | -0.289573 | -2.220760 | -1.021585 |

**1b** ( $C_1$ ): M062X/6-311+G(3d) for S and 6-311++G(d, p) for C, N, O and H. $E = -1442.6291965$  au,  $\nu = 522.5384$   $\text{cm}^{-1}$ 

|    |    |   |           |           |           |
|----|----|---|-----------|-----------|-----------|
| 1  | 16 | 0 | 0.410381  | 1.942814  | -0.634161 |
| 2  | 16 | 0 | -0.900663 | 2.028903  | 0.935709  |
| 3  | 6  | 0 | -1.708834 | 0.391261  | 1.002538  |
| 4  | 6  | 0 | 1.918495  | 1.131454  | -0.017770 |
| 5  | 6  | 0 | -2.055994 | -0.180595 | -0.366824 |
| 6  | 6  | 0 | 1.915599  | -0.397456 | -0.204909 |
| 7  | 6  | 0 | -2.515051 | -1.627583 | -0.156462 |
| 8  | 8  | 0 | -1.744793 | -2.515704 | 0.086332  |
| 9  | 8  | 0 | -3.830327 | -1.807418 | -0.235621 |
| 10 | 7  | 0 | -3.110479 | 0.600265  | -1.010354 |
| 11 | 1  | 0 | -1.134940 | -0.233677 | -0.954737 |
| 12 | 1  | 0 | -4.206840 | -0.940180 | -0.485016 |
| 13 | 1  | 0 | -3.011551 | 0.592539  | -2.019577 |
| 14 | 1  | 0 | -3.062137 | 1.570742  | -0.714866 |
| 15 | 1  | 0 | -1.051641 | -0.295148 | 1.527570  |
| 16 | 1  | 0 | -2.621077 | 0.569548  | 1.582523  |
| 17 | 1  | 0 | 1.599968  | -0.610873 | -1.229982 |
| 18 | 1  | 0 | 2.042905  | 1.384449  | 1.036743  |
| 19 | 1  | 0 | 2.727637  | 1.589601  | -0.592630 |
| 20 | 7  | 0 | 1.025899  | -1.037535 | 0.738105  |
| 21 | 6  | 0 | 3.354534  | -0.885744 | -0.067272 |
| 22 | 8  | 0 | 3.784699  | -1.499710 | 0.867767  |
| 23 | 8  | 0 | 4.112926  | -0.513130 | -1.113528 |
| 24 | 1  | 0 | 0.560891  | -1.852625 | 0.350000  |
| 25 | 1  | 0 | 1.546622  | -1.336493 | 1.557734  |
| 26 | 1  | 0 | 5.014210  | -0.824789 | -0.952196 |

**1c** ( $C_1$ ): M062X/6-311+G(3d) for S and 6-311++G(d, p) for C, N, O and H. $E = -1442.6290467$  au,  $\nu = 506.8351$   $\text{cm}^{-1}$ 

|    |    |   |           |           |           |
|----|----|---|-----------|-----------|-----------|
| 1  | 16 | 0 | -0.622652 | 1.784461  | -1.006404 |
| 2  | 16 | 0 | 0.419155  | 1.923396  | 0.756981  |
| 3  | 6  | 0 | 1.406191  | 0.402299  | 0.907313  |
| 4  | 6  | 0 | -2.150572 | 0.932225  | -0.519915 |
| 5  | 6  | 0 | 2.455139  | 0.168941  | -0.175901 |
| 6  | 6  | 0 | -1.937841 | -0.464263 | 0.076047  |
| 7  | 6  | 0 | 3.493922  | -0.841235 | 0.364981  |
| 8  | 8  | 0 | 3.958290  | -0.759536 | 1.467501  |
| 9  | 8  | 0 | 3.827398  | -1.783170 | -0.506879 |
| 10 | 7  | 0 | 1.923345  | -0.316785 | -1.450429 |
| 11 | 1  | 0 | 3.012774  | 1.096822  | -0.336124 |
| 12 | 1  | 0 | 3.264150  | -1.610386 | -1.294381 |
| 13 | 1  | 0 | 0.969000  | -0.658998 | -1.329480 |
| 14 | 1  | 0 | 1.878822  | 0.425355  | -2.136707 |
| 15 | 1  | 0 | 1.913110  | 0.534246  | 1.867097  |
| 16 | 1  | 0 | 0.754601  | -0.469677 | 0.985148  |
| 17 | 1  | 0 | -1.441994 | -0.336781 | 1.044557  |
| 18 | 1  | 0 | -2.728434 | 0.864668  | -1.449143 |
| 19 | 1  | 0 | -2.703714 | 1.552479  | 0.184381  |
| 20 | 7  | 0 | -1.120767 | -1.304547 | -0.780466 |
| 21 | 6  | 0 | -3.309013 | -1.070456 | 0.361643  |
| 22 | 8  | 0 | -3.757480 | -2.037811 | -0.185746 |
| 23 | 8  | 0 | -3.970390 | -0.380934 | 1.305024  |
| 24 | 1  | 0 | -1.092045 | -2.247596 | -0.402499 |
| 25 | 1  | 0 | -1.568341 | -1.395352 | -1.689876 |
| 26 | 1  | 0 | -4.829519 | -0.804628 | 1.439848  |

**2a** ( $C_1$ ): M062X/6-311+G(3d) for S and Se and 6-311++G(d, p) for C, N, O and H. $E = -3446.0085859$  au,  $\nu = 414.4146$   $\text{cm}^{-1}$ 

|    |    |   |           |           |           |
|----|----|---|-----------|-----------|-----------|
| 1  | 16 | 0 | 0.077689  | -1.921698 | 1.013398  |
| 2  | 34 | 0 | -1.406730 | -1.307631 | -0.487351 |
| 3  | 6  | 0 | -2.551025 | -0.078146 | 0.556856  |
| 4  | 6  | 0 | 1.338800  | -0.605188 | 1.006331  |
| 5  | 6  | 0 | -2.404232 | 1.382615  | 0.122123  |
| 6  | 6  | 0 | 1.938995  | -0.320501 | -0.371016 |
| 7  | 6  | 0 | -1.009289 | 1.860797  | 0.525114  |
| 8  | 8  | 0 | -0.644120 | 1.885252  | 1.673538  |
| 9  | 8  | 0 | -0.239486 | 2.184767  | -0.508588 |
| 10 | 7  | 0 | -2.768893 | 1.535012  | -1.273835 |
| 11 | 1  | 0 | -3.106385 | 1.958760  | 0.733743  |
| 12 | 1  | 0 | 0.685518  | 2.342286  | -0.209106 |
| 13 | 1  | 0 | -2.013115 | 1.195174  | -1.861872 |
| 14 | 1  | 0 | -2.886676 | 2.514875  | -1.505082 |
| 15 | 1  | 0 | -3.575257 | -0.403557 | 0.379726  |
| 16 | 1  | 0 | -2.281909 | -0.218615 | 1.602554  |
| 17 | 1  | 0 | 1.130869  | -0.012142 | -1.042368 |
| 18 | 1  | 0 | 2.116066  | -0.987538 | 1.678165  |
| 19 | 1  | 0 | 0.926321  | 0.302913  | 1.443695  |
| 20 | 7  | 0 | 2.700770  | -1.466039 | -0.862611 |
| 21 | 6  | 0 | 2.867610  | 0.888560  | -0.211869 |
| 22 | 8  | 0 | 2.450372  | 2.010035  | -0.054062 |
| 23 | 8  | 0 | 4.157209  | 0.605314  | -0.224779 |
| 24 | 1  | 0 | 2.656992  | -1.531520 | -1.873702 |
| 25 | 1  | 0 | 2.314814  | -2.330468 | -0.494178 |
| 26 | 1  | 0 | 4.218472  | -0.358132 | -0.394979 |

**2b** ( $C_1$ ): M062X/6-311+G(3d) for S and Se and 6-311++G(d, p) for C, N, O and H. $E = -3446.0026241$  au,  $\nu = 423.5810$   $\text{cm}^{-1}$ 

|    |    |   |           |           |           |
|----|----|---|-----------|-----------|-----------|
| 1  | 16 | 0 | -1.875670 | -1.702064 | 0.502745  |
| 2  | 34 | 0 | -0.133458 | -1.220709 | -0.732024 |
| 3  | 6  | 0 | 1.344298  | -1.259398 | 0.579574  |
| 4  | 6  | 0 | -2.416830 | -0.122677 | 1.252144  |
| 5  | 6  | 0 | 2.614597  | -0.598805 | 0.011327  |
| 6  | 6  | 0 | -2.395275 | 1.129560  | 0.371333  |
| 7  | 6  | 0 | 2.278458  | 0.862455  | -0.262880 |
| 8  | 8  | 0 | 2.286703  | 1.706931  | 0.603018  |
| 9  | 8  | 0 | 1.908414  | 1.094174  | -1.514898 |
| 10 | 7  | 0 | 3.684136  | -0.777423 | 0.975207  |
| 11 | 1  | 0 | 2.890547  | -1.080019 | -0.930139 |
| 12 | 1  | 0 | 1.412165  | 1.932180  | -1.542862 |
| 13 | 1  | 0 | 4.573483  | -0.484408 | 0.585516  |
| 14 | 1  | 0 | 3.507642  | -0.195557 | 1.789323  |
| 15 | 1  | 0 | 1.012799  | -0.721342 | 1.469693  |
| 16 | 1  | 0 | 1.570780  | -2.293302 | 0.829620  |
| 17 | 1  | 0 | -2.938145 | 1.888436  | 0.953946  |
| 18 | 1  | 0 | -1.851217 | 0.055870  | 2.163931  |
| 19 | 1  | 0 | -3.455601 | -0.336992 | 1.515890  |
| 20 | 7  | 0 | -3.094922 | 0.937894  | -0.876175 |
| 21 | 6  | 0 | -0.999031 | 1.742580  | 0.236550  |
| 22 | 8  | 0 | -0.576068 | 2.272099  | -0.761575 |
| 23 | 8  | 0 | -0.334988 | 1.720834  | 1.395141  |
| 24 | 1  | 0 | -2.950530 | 1.739985  | -1.480392 |
| 25 | 1  | 0 | -2.727785 | 0.127511  | -1.364751 |
| 26 | 1  | 0 | 0.549851  | 2.106883  | 1.260116  |

**2c** ( $C_1$ ): M062X/6-311+G(3d) for S and Se and 6-311++G(d, p) for C, N, O and H. $E = -3446.0019381$  au,  $\nu = 414.7042$   $\text{cm}^{-1}$ 

|    |    |   |           |           |           |
|----|----|---|-----------|-----------|-----------|
| 1  | 16 | 0 | -0.845057 | -1.746305 | 0.884283  |
| 2  | 34 | 0 | 0.334495  | -1.213319 | -0.895960 |
| 3  | 6  | 0 | 2.136125  | -1.118611 | -0.085791 |
| 4  | 6  | 0 | -1.462291 | -0.178086 | 1.573075  |
| 5  | 6  | 0 | 2.814937  | 0.248421  | -0.218952 |
| 6  | 6  | 0 | -2.579915 | 0.502854  | 0.763731  |
| 7  | 6  | 0 | 1.831845  | 1.301934  | 0.275776  |
| 8  | 8  | 0 | 1.464177  | 1.349147  | 1.423708  |
| 9  | 8  | 0 | 1.413129  | 2.110802  | -0.687653 |
| 10 | 7  | 0 | 4.049825  | 0.197407  | 0.551428  |
| 11 | 1  | 0 | 3.054453  | 0.454071  | -1.263590 |
| 12 | 1  | 0 | 0.603778  | 2.568939  | -0.388171 |
| 13 | 1  | 0 | 4.619871  | 1.016874  | 0.372049  |
| 14 | 1  | 0 | 3.824208  | 0.196106  | 1.542707  |
| 15 | 1  | 0 | 1.985424  | -1.349878 | 0.969388  |
| 16 | 1  | 0 | 2.758724  | -1.886464 | -0.541451 |
| 17 | 1  | 0 | -3.093686 | 1.182121  | 1.451298  |
| 18 | 1  | 0 | -0.636140 | 0.514020  | 1.742327  |
| 19 | 1  | 0 | -1.860688 | -0.489816 | 2.543217  |
| 20 | 7  | 0 | -3.551697 | -0.396491 | 0.148843  |
| 21 | 6  | 0 | -1.992779 | 1.446891  | -0.299612 |
| 22 | 8  | 0 | -1.196800 | 2.304770  | -0.012900 |
| 23 | 8  | 0 | -2.470234 | 1.279325  | -1.518042 |
| 24 | 1  | 0 | -4.442108 | -0.395803 | 0.627690  |
| 25 | 1  | 0 | -3.196545 | -1.348008 | 0.111073  |
| 26 | 1  | 0 | -3.125826 | 0.552362  | -1.444595 |

**3a** ( $C_1$ ): M062X/6-311+G(3d) for Se and 6-311++G(d, p) for C, N, O and H. $E = -5449.3744678$  au,  $\nu = 301.9359$   $\text{cm}^{-1}$ 

|    |    |   |           |           |           |
|----|----|---|-----------|-----------|-----------|
| 1  | 34 | 0 | -0.221890 | -0.949864 | -1.289465 |
| 2  | 34 | 0 | -1.423724 | -1.470442 | 0.634531  |
| 3  | 6  | 0 | -1.805643 | 0.227218  | 1.580206  |
| 4  | 6  | 0 | 1.638208  | -0.982265 | -0.649037 |
| 5  | 6  | 0 | -2.303671 | 1.413553  | 0.754190  |
| 6  | 6  | 0 | 2.038039  | 0.308142  | 0.079900  |
| 7  | 6  | 0 | -1.151319 | 2.092627  | 0.009552  |
| 8  | 8  | 0 | -1.164635 | 2.377180  | -1.157662 |
| 9  | 8  | 0 | -0.131519 | 2.357704  | 0.832257  |
| 10 | 7  | 0 | -3.438101 | 1.065617  | -0.068534 |
| 11 | 1  | 0 | -2.629282 | 2.156522  | 1.495300  |
| 12 | 1  | 0 | 0.676252  | 2.529770  | 0.293038  |
| 13 | 1  | 0 | -3.189462 | 0.312648  | -0.703230 |
| 14 | 1  | 0 | -3.697572 | 1.856873  | -0.648284 |
| 15 | 1  | 0 | -2.605316 | -0.093296 | 2.251644  |
| 16 | 1  | 0 | -0.933278 | 0.507431  | 2.163646  |
| 17 | 1  | 0 | 1.412608  | 0.386788  | 0.976826  |
| 18 | 1  | 0 | 2.242257  | -1.116015 | -1.551573 |
| 19 | 1  | 0 | 1.752758  | -1.851066 | -0.002590 |
| 20 | 7  | 0 | 1.929087  | 1.525908  | -0.714707 |
| 21 | 6  | 0 | 3.473865  | 0.155340  | 0.547951  |
| 22 | 8  | 0 | 4.416438  | 0.723300  | 0.070941  |
| 23 | 8  | 0 | 3.574822  | -0.732757 | 1.547074  |
| 24 | 1  | 0 | 2.830620  | 1.764503  | -1.117544 |
| 25 | 1  | 0 | 1.246539  | 1.421034  | -1.462204 |
| 26 | 1  | 0 | 4.510122  | -0.816580 | 1.777949  |

**3b** ( $C_1$ ): M062X/6-311+G(3d) for Se and 6-311++G(d, p) for C, N, O and H. $E = -5449.373934$  au,  $\nu = 308.0088$   $\text{cm}^{-1}$ 

|    |    |   |           |           |           |
|----|----|---|-----------|-----------|-----------|
| 1  | 34 | 0 | -0.921922 | -1.653792 | 0.548847  |
| 2  | 34 | 0 | 0.480949  | -0.903805 | -1.154050 |
| 3  | 6  | 0 | 2.235228  | -1.040778 | -0.246524 |
| 4  | 6  | 0 | -1.492389 | -0.008089 | 1.470660  |
| 5  | 6  | 0 | 2.981359  | 0.292570  | -0.138839 |
| 6  | 6  | 0 | -2.511105 | 0.853740  | 0.712270  |
| 7  | 6  | 0 | 2.016677  | 1.316719  | 0.446257  |
| 8  | 8  | 0 | 1.581038  | 1.223516  | 1.567447  |
| 9  | 8  | 0 | 1.696425  | 2.271715  | -0.415378 |
| 10 | 7  | 0 | 4.162553  | 0.066583  | 0.682417  |
| 11 | 1  | 0 | 3.294533  | 0.631917  | -1.127557 |
| 12 | 1  | 0 | 0.885558  | 2.721698  | -0.106874 |
| 13 | 1  | 0 | 3.877911  | -0.060222 | 1.650028  |
| 14 | 1  | 0 | 4.781667  | 0.869275  | 0.651365  |
| 15 | 1  | 0 | 2.022252  | -1.422002 | 0.752379  |
| 16 | 1  | 0 | 2.843526  | -1.762273 | -0.788812 |
| 17 | 1  | 0 | -2.968630 | 1.519311  | 1.451781  |
| 18 | 1  | 0 | -0.611333 | 0.575698  | 1.737098  |
| 19 | 1  | 0 | -1.949103 | -0.400140 | 2.382854  |
| 20 | 7  | 0 | -3.562623 | 0.132718  | 0.000613  |
| 21 | 6  | 0 | -1.798872 | 1.821930  | -0.248057 |
| 22 | 8  | 0 | -0.924995 | 2.559157  | 0.131914  |
| 23 | 8  | 0 | -2.254722 | 1.817359  | -1.485687 |
| 24 | 1  | 0 | -3.303830 | -0.837273 | -0.157775 |
| 25 | 1  | 0 | -4.451589 | 0.163789  | 0.481118  |
| 26 | 1  | 0 | -2.994768 | 1.172887  | -1.490915 |

**3c** ( $C_1$ ): M062X/6-311+G(3d) for Se and 6-311++G(d, p) for C, N, O and H. $E = -5449.3732093$  au,  $\nu = 298.6601$   $\text{cm}^{-1}$ 

|    |    |   |           |           |           |
|----|----|---|-----------|-----------|-----------|
| 1  | 34 | 0 | 0.348849  | -0.889881 | -0.928490 |
| 2  | 34 | 0 | -1.549536 | -1.475135 | 0.290809  |
| 3  | 6  | 0 | -1.906565 | 0.142971  | 1.354755  |
| 4  | 6  | 0 | 1.756864  | -1.499767 | 0.315673  |
| 5  | 6  | 0 | -2.415360 | 1.344359  | 0.551845  |
| 6  | 6  | 0 | 2.514586  | -0.353022 | 0.965297  |
| 7  | 6  | 0 | -1.254675 | 2.094813  | -0.131893 |
| 8  | 8  | 0 | -0.253222 | 2.399555  | 0.459528  |
| 9  | 8  | 0 | -1.480568 | 2.427154  | -1.391881 |
| 10 | 7  | 0 | -3.469038 | 1.063685  | -0.419938 |
| 11 | 1  | 0 | -2.796879 | 2.073292  | 1.275414  |
| 12 | 1  | 0 | -2.375450 | 2.086798  | -1.600354 |
| 13 | 1  | 0 | -4.392536 | 1.254728  | -0.054675 |
| 14 | 1  | 0 | -3.431880 | 0.094763  | -0.726887 |
| 15 | 1  | 0 | -2.678447 | -0.185196 | 2.055226  |
| 16 | 1  | 0 | -1.006101 | 0.394283  | 1.914474  |
| 17 | 1  | 0 | 3.281239  | -0.792558 | 1.616010  |
| 18 | 1  | 0 | 2.424547  | -2.123886 | -0.276590 |
| 19 | 1  | 0 | 1.260572  | -2.095760 | 1.078101  |
| 20 | 7  | 0 | 1.646618  | 0.466842  | 1.796623  |
| 21 | 6  | 0 | 3.270770  | 0.436242  | -0.101578 |
| 22 | 8  | 0 | 3.296168  | 0.173085  | -1.273443 |
| 23 | 8  | 0 | 3.924217  | 1.485155  | 0.424116  |
| 24 | 1  | 0 | 1.060206  | 1.068597  | 1.219623  |
| 25 | 1  | 0 | 2.204161  | 1.084819  | 2.376168  |
| 26 | 1  | 0 | 4.344370  | 1.963803  | -0.303312 |

**4** ( $C_2$ ): M062X/6-311+G(3d) for S and 6-311++G(d, p) for C and H.

$E = -876.1780226$  au,  $\nu = 513.7069$   $\text{cm}^{-1}$

|    |    |   |           |           |           |
|----|----|---|-----------|-----------|-----------|
| 1  | 1  | 0 | -0.268681 | 2.360564  | 0.567134  |
| 2  | 1  | 0 | -1.987697 | 1.976908  | 0.839386  |
| 3  | 1  | 0 | -0.738540 | 1.123144  | 1.771252  |
| 4  | 6  | 0 | -0.975900 | 1.568678  | 0.806193  |
| 5  | 16 | 0 | -0.975900 | 0.312015  | -0.500933 |
| 6  | 16 | 0 | 0.975900  | -0.312015 | -0.500933 |
| 7  | 6  | 0 | 0.975900  | -1.568678 | 0.806193  |
| 8  | 1  | 0 | 0.268681  | -2.360564 | 0.567134  |
| 9  | 1  | 0 | 1.987697  | -1.976908 | 0.839386  |
| 10 | 1  | 0 | 0.738540  | -1.123144 | 1.771252  |

**5** ( $C_1$ ): M062X/6-311+G(3d) for S and Se and 6-311++G(d, p) for C and H.

$E = -2879.5481642$  au,  $\nu = 419.7233$   $\text{cm}^{-1}$

|    |    |   |           |           |           |
|----|----|---|-----------|-----------|-----------|
| 1  | 1  | 0 | -2.148588 | -0.029279 | -1.563347 |
| 2  | 1  | 0 | -3.184576 | 0.690641  | -0.306100 |
| 3  | 1  | 0 | -1.748779 | 1.571709  | -0.872671 |
| 4  | 6  | 0 | -2.158880 | 0.584685  | -0.664883 |
| 5  | 16 | 0 | -1.239734 | -0.227720 | 0.671789  |
| 6  | 34 | 0 | 0.763085  | -0.437699 | -0.194718 |
| 7  | 6  | 0 | 1.498186  | 1.318143  | 0.263994  |
| 8  | 1  | 0 | 1.454188  | 1.455744  | 1.341276  |
| 9  | 1  | 0 | 2.535741  | 1.317693  | -0.071451 |
| 10 | 1  | 0 | 0.947044  | 2.101825  | -0.250577 |

**6** ( $C_2$ ): M062X/6-311+G(3d) for Se and 6-311++G(d, p) for C and H.

$E = -4882.9205598$  au,  $\nu = 307.6595$   $\text{cm}^{-1}$

|    |    |   |           |           |           |
|----|----|---|-----------|-----------|-----------|
| 1  | 1  | 0 | 1.569891  | 1.926018  | 0.829660  |
| 2  | 1  | 0 | 0.143184  | 2.945255  | 1.161478  |
| 3  | 1  | 0 | 0.360602  | 1.415840  | 2.047846  |
| 4  | 6  | 0 | 0.516762  | 1.922679  | 1.098734  |
| 5  | 34 | 0 | -0.516762 | 1.040553  | -0.312688 |
| 6  | 34 | 0 | 0.516762  | -1.040553 | -0.312688 |
| 7  | 6  | 0 | -0.516762 | -1.922679 | 1.098734  |
| 8  | 1  | 0 | -1.569891 | -1.926018 | 0.829660  |
| 9  | 1  | 0 | -0.143184 | -2.945255 | 1.161478  |
| 10 | 1  | 0 | -0.360602 | -1.415840 | 2.047846  |
